# Supplementary material for: Efficient cyanide sensing using plasmonic Ag/Fe 3 O 4 nanoparticles
Source: Royal Society of Chemistry journal article supplement (doi:10.1039/d3ra06654a), 2023-01-01
Supplement: d3ra06654a1.pdf [file d3ra06654a1.pdf]

## Supplementary material

### Efficient cyanide sensing using plasmonic Ag/Fe<sub>3</sub>O<sub>4</sub> nanoparticles

Razieh Moosavi<sup>1,2</sup>, Ramin Zibasereshht<sup>2,3\*</sup>

<sup>1</sup>Nano Electronic Center of Excellence, Nano Bio Electronic Devices Lab, School of Electrical and Computer Engineering, University of Tehran, Tehran, Iran.

<sup>2</sup>Biomaterials and Medicinal Chemistry Research Centre, Aja University of Medical Sciences, Tehran, Iran

<sup>3</sup>Department of Chemistry and Physics, Faculty of sciences, Maritime University of Imam Khomeini, Nowshahr, Iran.

**Table 1S.** Performance summary of most sensitive scientific reported cyanide sensors with significant analytical features in the literature

| Method                                                                                                                                                                                             | Minimum reported LOD <sup>b</sup> (nmol L <sup>-1</sup> ) | LDR <sup>a</sup> (μmol L <sup>-1</sup> ) | Publish year | Ref. |
|----------------------------------------------------------------------------------------------------------------------------------------------------------------------------------------------------|-----------------------------------------------------------|------------------------------------------|--------------|------|
| Cysteamine-decorated gold nanoparticles for plasmon-based colorimetric on-site sensors using the smart-phone color ratio and for catalytic reduction of 4-nitrophenol                              | 159                                                       | -                                        | 2023         | 1    |
| Smartphone-Based Attomolar Cyanide Ion Sensing Using Au-Graphene Oxide Cryosoret Nanoassembly and Benzoxazolium-Based Fluorophore in a Surface Plasmon-Coupled Enhanced Fluorescence Interface     | 1                                                         | -                                        | 2023         | 2    |
| Ratiometric orange fluorescent and colorimetric highly sensitive imidazolium-bearing naphthoquinolinedione-based probe                                                                             | 1 and 0.13 pM                                             | -                                        | 2023         | 3    |
| Synthesis of novel 3-hydroxy-2-naphthoic hydrazones as selective chemosensors for cyanide ions                                                                                                     | 8.2                                                       | -                                        | 2023         | 4    |
| A benzoxazole-based fluorescent 'off-on-off' probe for cascade recognition of cyanide and Fe <sup>3+</sup> ions                                                                                    | 23                                                        | -                                        | 2023         | 5    |
| Turn-on fluorescent and colorimetric sensor for cyanide and acetate-based Schiff base compound of 2,2'-((1E,11E)-5,8-dioxa-2,11-diazadodeca-1,11-diene-1,12-diyl)bis(4-((E)-phenyldiazenyl)phenol) | 2.1                                                       | -                                        | 2023         | 6    |
| Colorimetric, fluorometric, and electrochemical sensing of cyanide ion in aqueous media using merocyanine-ferrocene conjugate                                                                      | UV: 2.28, fluorescence spectroscopy: 1.48, and CV: 0.61   | -                                        | 2023         | 7    |
| Fluorometric and colorimetric sensor                                                                                                                                                               | 1.2                                                       | 0–10 μL                                  | 2023         | 8    |

|                                                                                                                                               |                        |                       |      |    |
|-----------------------------------------------------------------------------------------------------------------------------------------------|------------------------|-----------------------|------|----|
| by pyridinium scaffolds: live cell imaging and real sample analysis                                                                           |                        | Not exactly mentioned |      |    |
| Silicon nanoparticles as a fluorometric probe for sensitive detection of cyanide ion and its application in <i>C. elegans</i> bio-imaging     | 0.90                   | 0 - 33                | 2023 | 9  |
| Electron-deficient moiety regulated structure: an efficient strategy for the design of a highly sensitive cyanide “turn-on” fluorescent probe | 58                     | 0.025–40.0            | 2023 | 10 |
| Bis-BODIPY-based fluoride and cyanide sensor mediated by unconventional deprotonation of C–H proton                                           | 83                     | -                     | 2022 | 11 |
| Fluorene based fluorescent and colorimetric chemosensors                                                                                      | 0.07 & 0.15            | 0–0.1                 | 2022 | 12 |
| Anoptical sensor in aqueous solution and living cells with a fluorogenic naphthalene based receptor (NFS)                                     | 210                    | -                     | 2022 | 13 |
| Spiropyran and spironaphthoxazine based opto-chemical probes for instant ion detection                                                        | SPOH (91) and SNO (94) | -                     | 2022 | 14 |
| A robust gold nanocluster-peroxyoxalate chemiluminescence system                                                                              | 0.021                  | 0.096–4.8 nM          | 2022 | 15 |
| Dual anion colorimetric and fluorometric sensing of arsenite and cyanide ions involving MLCT and CHEF pathways                                | 0.37                   | 0-100                 | 2022 | 16 |
| Fluorescent lysozyme gold-aryl bioconjugates                                                                                                  | -                      | 1 to 12               | 2022 | 17 |
| Aggregation induced emission based fluorenes as dual-channel fluorescent probes for smartphones and logic gates applications                  | 0.50, 0.51 & 0.57      | 0-0.5                 | 2022 | 18 |
| Development of AIEE active fluorescent and colorimetric probe for the solid, solution, and vapor phase detection                              | 6.17                   | -                     | 2022 | 19 |
| Sequential colorimetric sensor via the complexation–decomplexation mechanism based on sugar pyrazolidine-3,5-dione                            | 480                    | -                     | 2022 | 20 |
| Selective fluorigenic chemosensor for cyanide                                                                                                 | 234 & 11               | -                     | 2021 | 21 |
| Coumarin-based chemosensor                                                                                                                    | 57.9                   | -                     | 2021 | 22 |
| Fluorescence sensing based on Au-modified upconversion nanoassemblies                                                                         | 153                    | 0 to 200              | 2021 | 23 |
| Complexation–Decomplexation mechanism with Di(bissulfonamido)spirobifluorene for copper(II) and cyanide sensing                               | 390                    | 0 to 10               | 2021 | 24 |
| Mercuric cation-graphene quantum                                                                                                              | 310                    | 5.0–15.0              | 2021 | 25 |

|                                                                                                                                                              |                            |                       |      |    |
|--------------------------------------------------------------------------------------------------------------------------------------------------------------|----------------------------|-----------------------|------|----|
| dots for fluorescence switching detections of cyanide and ferricyanide                                                                                       |                            |                       |      |    |
| Functional dye based optical sensors by Naphthalene Flanked Diketopyrrolopyrrole                                                                             | 500 & 50                   | 0.05 to 1 & 0.5 to 10 | 2021 | 26 |
| Origami paper analytical assay based on metal complex sensor for fire survivors                                                                              | 400                        | 1-100                 | 2021 | 27 |
| Recognition in a wide pH range by a trifluoroacetamido based metal-organic framework                                                                         | 280                        | -                     | 2021 | 28 |
| Tetra-imidazole functionalized pyrene for constructing Co-MOF and cyanide sensing                                                                            | 89.3                       | 0-27                  | 2021 | 29 |
| Rational design of an ICT-based chemodosimeter with aggregation-induced emission for colorimetric and ratiometric fluorescent detection                      | 17                         | 0 to 20               | 2021 | 30 |
| An imine based probe for fluorescent cyanide sensing with red-emission in solid and solution phases                                                          | 500                        | 0 to 25               | 2021 | 31 |
| A sensitive and selective BINOL based ratiometric fluorescence sensor                                                                                        | 189                        | 0-20                  | 2021 | 32 |
| Gold nanoparticles-decorated paper-based sensor for rapid cyanide detection in water                                                                         | 7680                       | -                     | 2021 | 33 |
| A flexible salamo-based colorimetric and proportional chemical sensor                                                                                        | 128                        | 0-20                  | 2021 | 34 |
| “OFF-ON” fluorescence bisphenol-based cyanide sensing                                                                                                        | 380                        | 0-60                  | 2021 | 35 |
| Controllable and reversible sensing cyanide ion using dual-functional Cu (II)-based ensemble                                                                 | In order of nM             | 0-2500<br>0-1800      | 2021 | 36 |
| Aggregation-induced emission-based material                                                                                                                  | 67                         |                       | 2021 | 37 |
| A chemosensor derived from benzamide hydrazones                                                                                                              | 2150-5837                  | 2.15 to 17.5          | 2020 | 38 |
| Cyanide chemosensors based on 3-dicyanovinylpyrazolo [1, 5-a] pyrimidines: effects of peripheral 4-anisyl group substitution on the photophysical properties | 300 in DPPa to 170 in DPPc | -                     | 2020 | 39 |
| Visual and colorimetric detection based on the morphological transformation of gold nanobipyramids into gold NPs                                             | 1.58                       | 1 -15                 | 2020 | 40 |
| Rationally designed imidazole derivative as colorimetric and fluorometric sensor                                                                             | 5300 & 41                  | -                     | 2020 | 41 |
| Multi-Stimuli Responsive FRET Processes of BiFluorophoric AIEgens in an Amphiphilic Copolymer                                                                | 260                        | 0-80                  | 2020 | 42 |
| A coumarin-connected carboxylic indolinium sensor for cyanide detection                                                                                      | $4.44 \times 10^5$         | -                     | 2020 | 43 |

|                                                                                                                                     |             |            |      |    |
|-------------------------------------------------------------------------------------------------------------------------------------|-------------|------------|------|----|
| Rapid ‘color to concentration’ cyanide quantification using paper-based sensing chip                                                | 860         | 0–20       | 2020 | 44 |
| Electrochemical Sensor Based on Silver Nanoparticles/Multi-walled Carbon Nanotubes Modified Glassy Carbon Electrode                 | 4           | 0.1 to 210 | 2020 | 45 |
| Ratiometric sensing using dual-emissive Au nanoclusters                                                                             | 10          | 0.02-1     | 2020 | 46 |
| Phenothiazine-based visual and fluorescent sensor                                                                                   | 11          | -          | 2020 | 47 |
| turn-off fluorescent detection using dicyanovinyl-substituted phenanthridine fluorophore                                            | 39.3        | 2-5        | 2020 | 26 |
| Sensing of aluminum and cyanide ions utilizing a bis-phenol a based fluorogenic probe                                               | 4.81        | -          | 2020 | 48 |
| Spontaneous optical response by a reactive binding site probe                                                                       | 9.28 & 0.61 | -          | 2020 | 49 |
| ON–OFF” optical sensor based on hydrogen bonding and water assisted aggregation induced emission                                    | 8.2         | Up to 0.21 | 2020 | 50 |
| Triphenylamine-thiophene dyad as a Chemodosimeter                                                                                   | 42.4        | 1–100      | 2020 | 51 |
| Stepwise assembly of turn-on fluorescence sensors in multicomponent metal–organic frameworks                                        | 50          | 0 to 2.67  | 2020 | 52 |
| On-site detection by colorimetric and fluorogenic sensors: Smartphone and test strip applications                                   | 450         | 5 to 35    | 2020 | 53 |
| Aryl Ethynylpyrene as fluorescent sensor                                                                                            | 66 & 87     | -          | 2020 | 13 |
| turn-off fluorescent detection using dicyanovinyl-substituted phenanthridine fluorophore                                            | 39.3        | 2 to 5     | 2020 | 26 |
| Fluorescence “turn-ON” nanosensor using supramolecular hybrid of graphene quantum dots and cobalt pyrene-derivatized phthalocyanine | 0.5         | 0.01-0.05  | 2019 | 54 |
| Sensor based on anion– $\pi$ interaction-driven electron transfer                                                                   | 870         | 0 to 20    | 2019 | 55 |
| Furan/thiophene-based fluorescent hydrazones as fluoride and cyanide                                                                | 1075        | -          | 2019 | 56 |
| A dual-mode sensor for colorimetric and turn-on fluorescent detection                                                               | 226         | 0-100      | 2019 | 57 |
| A carbazole-based colorimetric and fluorescent sensor with aggregation induced emission                                             | 67.4        | 0-10       | 2019 | 41 |
| A colorimetric and ratiometric fluorescent probe                                                                                    | 339         | 2-12       | 2019 | 58 |
| A colorimetric and fluorometric oligothiophene-indenedione-based sensor                                                             | 31.3        | 0-10       | 2019 | 59 |
| A turn-on fluorescent chemosensor                                                                                                   | 350         | -          | 2019 | 60 |

|                                                                                                                     |                          |                                  |        |    |
|---------------------------------------------------------------------------------------------------------------------|--------------------------|----------------------------------|--------|----|
| based on aggregation-induced emission                                                                               |                          |                                  |        |    |
| Stimuli-responsive gold nanoparticles modified with poly (N,N-dimethylaminoethyl methacrylate)                      | 0.0047                   | $10^{-5}$ - $10^{-3}$ & 0.04–320 | 2019   | 61 |
| Dicyanovinyl-substituted D-A type dithienylethenes: Synthesis, photochromism and colorimetric sensing               | 250                      | -                                | 2019   | 62 |
| Fluorescence turn-on chemodosimetric sensing by cyanovinylterpyridine modified phthalonitrile and subphthalocyanine | 94                       | -                                | 2019   | 63 |
| A mitochondria-targeted ratiometric fluorescent probe                                                               | 0.17                     | 0 to 18                          | 2019   | 64 |
| Colorimetric and fluorometric chemosensors for cyanide detection via ICT off in aqueous solution                    | 3600 & 4200<br>500 & 600 | -                                | 2019   | 65 |
| An easy to make chemoreceptor for ratiometric fluorescent detection in food                                         | 0.96 mM                  | Up to 160 mM                     | 2019   | 66 |
| Colorimetric sensor with an organic probe                                                                           | 195                      | -                                | 2019   | 67 |
| A coumarin chalcone compound as red fluorescent probe                                                               | 0.31                     | -                                | 2018   | 68 |
| nucleophilic addition and hydrogen-bond interaction                                                                 | 3 & 9.8                  | Up to 0.01 & 0.033               | 2018   | 69 |
| Paper-based headspace extraction combined with digital image analysis                                               | 26.92                    | 0.11-3.85                        | 2018   | 70 |
| Copper NPs as a fluorescent probe                                                                                   | 370                      | 0.5-18                           | 2017   | 71 |
| Nitrogen and sulfur co-doped graphene quantum dots for an inner filter effect-based cyanide sensor                  | 520                      | 10-500                           | 2017   | 72 |
| Electrochemical sensor by gold NPs decorated carbon ceramic electrode                                               | 90                       | 0.5-14                           | 2017   | 73 |
| Fluorescence sensor which in turn inhibit 2-way ESIPT                                                               | 600                      | -                                | 2017   | 74 |
| Photoluminescent copper nanoclusters                                                                                | 5                        | -                                | 2017   | 75 |
| Glassy carbon electrode modified with graphene oxide and titanium dioxide probe                                     | 100                      | 0.1-60                           | 2017   | 76 |
| Cyanide Mapping via Surface Plasmon Spectroscopy of Single Au–Ag Nanoboxes                                          | 1                        | Up to 40 nM                      | 2017   | 77 |
| Bimetallic gold-silver nanoclusters sensor                                                                          | 138                      | 0.005-10<br>& 20-50              | 2017   | 78 |
| Nano biosensor by Ag@Au core–shell nanoparticle (NP)/iridium(III) complex-based sensing platform                    | 36                       | 0.05-80                          | 2017   | 79 |
| IR 786 perchlorate (IR-786) as an optical sensor in organic media and on solid surfaces                             | 500                      | 0.5-8                            | -2016- | 80 |
| on-off ratiometric fluorescence probe based on perturbation of the interaction between gold nanoclusters            | 75                       | 0.1–220                          | 2016   | 81 |

|                                                                                                      |      |                       |      |           |
|------------------------------------------------------------------------------------------------------|------|-----------------------|------|-----------|
| and a copper (II)-phthalocyanine complex                                                             |      |                       |      |           |
| Water-soluble fluorescent probe                                                                      | 17   | 0.2–15                | 2016 | 82        |
| Gold nanodots probe                                                                                  | 150  | 0.29 -8.87            | 2016 | 83        |
| Spectrophotometric by Improved ninhydrin-based reagent                                               | 308  | 0.78- 15.38           | 2016 | 84        |
| An NIR molecule-based “On–Off” fluorescent and colorimetric Sensor                                   | 0.46 | 6-20                  | 2016 | 85        |
| Nano-sized imprinted polymer synthesis for carbon nanotube impregnated carbon paste electrode sensor | 8000 | 10–100000             | 2016 | 86        |
| Chemiluminescence sensor by gold NPs                                                                 | 13.6 | 0.017 – 1.33          | 2016 | 87        |
| Gold NP-based dual fluorescence–colorimetric sensor                                                  | 100  | 0-50                  | 2016 | 88        |
| Rapid turn-on fluorescence sensor                                                                    | 19.6 | -                     | 2016 | 89        |
| Displacement of the glutathione ligand of (GSCbl) by cyanide                                         | 1000 | 1–20                  | 2016 | 90        |
| DicanovinyI-based colorimetric and fluorescent sensor                                                | 14   | Up to 5               | 2016 | 91        |
| Colorimetric method by Ag@Au core–shell NPs                                                          | 160  | 0.4-32                | 2016 | 92        |
| Hexagonal cadmium oxide nanodisks as efficient scaffold                                              | 1400 | 10–80                 | 2016 | 93        |
| Amperometric inhibition biosensors                                                                   | 30   | 0.1–58.6              | 2015 | 94        |
| Conductometric sensor using imidazole based receptor                                                 | 10   | 0.01-1                | 2015 | 95        |
| Probe based on Ag/Fe <sub>3</sub> O <sub>4</sub> NPs                                                 | 1.54 | 0.005-0.05& 0.05-2.31 | 2015 | 96        |
| Improved Ag/Fe <sub>3</sub> O <sub>4</sub> NP sensor                                                 | ~0.4 | 0.001 to 160          |      | This work |

<sup>a</sup> Linear dynamic range, <sup>b</sup> Limit of detection

## References

1. R. Rajamanikandan, K. Shanmugaraj, M. Ilanchelian and H. Ju, *Chemosphere*, 2023, **316**, 137836.
2. V. S. K. Cheerla, K. M. Ganesh, S. Bhaskar, S. S. Ramamurthy and S. C. Neelakantan, *Langmuir*, 2023.
3. A. Kumar, W. Hur, G. H. Seong and P. S. Chae, *Analytica Chimica Acta*, 2023, **1267**, 341376.
4. R. D. Alharthy, I. Urooj, M. Tasleem, M. Khalid, M. A. Asghar, S. I. Khan, M. Ajmal, N. Ahmed and Z. Shafiq, *RSC advances*, 2023, **13**, 15208-15221.
5. N. Tohora, M. Mahato, T. Sultana, S. Ahamed, S. Ghanta and S. K. Das, *Journal of Photochemistry and Photobiology A: Chemistry*, 2023, **442**, 114807.
6. M. Saremi, A. Kakanejadifard, M. Ghasemian and M. Adeli, *Spectrochimica Acta Part A: Molecular and Biomolecular Spectroscopy*, 2023, **292**, 122397.
7. I. Kathuria, P. Sharma and S. Kumar, *Journal of Photochemistry and Photobiology A: Chemistry*, 2023, 115081.
8. K. Jamuna, S. Gayathri, S. Sivakumar and B. Ashokkumar, *Sensors & Diagnostics*, 2023, **2**, 337-346.
9. J. K. Alagarasan, S. Shasikala, S. Ganesan, M. Arunachalam, U. Manojkumar, S. Palaninaicker, D. D. Nguyen, S. W. Chang, M. Lee and H.-M. Lo, *Environmental Research*, 2023, **224**, 115402.

10. H. Wang, Z. Liu, T. Xie, L. Wang, Q. Xu, M. Chen, Z. Zhang, Z. Ma, S. Fan and H. Wu, *Sensors and Actuators B: Chemical*, 2023, **379**, 133218.
11. W. Saiyasombat, U. Eiamprasert, T. Chantarojsiri, K. Chainok and S. Kiatischevi, *Dyes and Pigments*, 2022, **206**, 110643.
12. M. T. Waseem, H. M. Junaid, S. Majeed, A. M. Khan, T. Mahmood and S. A. Shahzad, *Microchemical Journal*, 2022, **173**, 107018.
13. B. Yilmaz, M. Keskinates, Z. Aydin and M. Bayrakci, *Journal of Photochemistry and Photobiology A: Chemistry*, 2022, **424**, 113651.
14. S. Sanjabi, J. K. Rad and A. R. Mahdavian, *Journal of Photochemistry and Photobiology A: Chemistry*, 2022, **424**, 113626.
15. L. Li, T. Yang, J. Yang and X. Zhang, *Sensors and Actuators B: Chemical*, 2022, **353**, 131038.
16. S. A. Kumar, *Journal of Molecular Structure*, 2022, **1250**, 131677.
17. J. B. Parambath, M. Hameed and A. A. Mohamed, *Chemical Papers*, 2022, **76**, 3619-3626.
18. S. Majeed, M. T. Waseem, H. M. Junaid, G. S. Khan, S. Nawazish, T. Mahmood, A. M. Khan and S. A. Shahzad, *RSC advances*, 2022, **12**, 18897-18910.
19. S. Majeed, M. T. Waseem, G. S. Khan, H. M. Junaid, M. Imran, S. Nawazish, T. A. Khan, T. Mahmood and S. A. Shahzad, *Analyst*, 2022, **147**, 3885-3893.
20. J. Isaad and A. El Achari, *Journal of Molecular Structure*, 2022, **1252**, 132151.
21. H. Muniyasamy, C. Chinnadurai, M. Nelson, A. M. Kubendran, K. Sukumaran, A. Balasubramaniam, M. Sepperumal, S. Ayyanar, M. Govindasamy and A. Ghfar, *Journal of Molecular Liquids*, 2021, **334**, 116076.
22. T. Devendhiran, K. Kumarasamy, M.-C. Lin and Y. X. Yang, *Inorganic Chemistry Communications*, 2021, **134**, 108951.
23. C. Sun and M. Gradzielski, *Analyst*, 2021, **146**, 2152-2159.
24. K. Silpcharu, S. Soonthonhut, M. Sukwattanasinitt and P. Rashatasakhon, *ACS omega*, 2021, **6**, 16696-16703.
25. N. Kongsanan, N. Pimsin, C. Keawprom, P. Sricharoen, Y. Areerob, P. Nuengmatcha, W.-C. Oh, S. Chanthai and N. Limchoowong, *ACS omega*, 2021, **6**, 14379-14393.
26. S. Manickam and S. K. Iyer, *RSC advances*, 2020, **10**, 11791-11799.
27. A. Sheini, M. D. Aseman and M. M. Bordbar, *Scientific Reports*, 2021, **11**, 1-11.
28. A. Rana, C. Gogoi, S. Ghosh, S. Nandi, S. Kumar, U. Manna and S. Biswas, *New Journal of Chemistry*, 2021, **45**, 20193-20200.
29. Y. Liu, Q. Qiu, X. Zhang, K. Huang and D. Qin, *Journal of Solid State Chemistry*, 2021, **300**, 122258.
30. S. D. Padghan, L.-C. Wang, W.-C. Lin, J.-W. Hu, W.-C. Liu and K.-Y. Chen, *ACS omega*, 2021, **6**, 5287-5296.
31. C. Nandhini, P. S. Kumar, K. Poongodi, R. Shanmugapriya and K. P. Elango, *Journal of Molecular Liquids*, 2021, **327**, 114833.
32. S. Munusamy, S. Swaminathan, D. Jothi, V. P. Muralidharan and S. K. Iyer, *RSC advances*, 2021, **11**, 15656-15662.
33. M. L. Budlayan, J. P. Lagare-Oracion, L. D. Rosa, M. J. Rodriguez, J. Manigo, A. Alguno, E. Austria, S. Arco, J. Patricio and C. Deocarís, *Advances in Natural Sciences: Nanoscience and Nanotechnology*, 2021, **12**, 025007.
34. G.-H. Liu, Z.-Z. Chen, Y.-H. Deng and W.-K. Dong, *Journal of Photochemistry and Photobiology A: Chemistry*, 2021, **414**, 113271.
35. Z. Ullah, P. M. Sonawane, T. S. Nguyen, M. Garai, D. G. Churchill and C. T. Yavuz, *Spectrochimica Acta Part A: Molecular and Biomolecular Spectroscopy*, 2021, **259**, 119881.
36. J. Wang, J. He, J. Zhang, Z. Chen, J. Liang and L. Chen, *Spectrochimica Acta Part A: Molecular and Biomolecular Spectroscopy*, 2021, **252**, 119526.

37. G. A. Zalmi, D. N. Nadimetla, P. Kotharkar, A. L. Puyad, M. Kowshik and S. V. Bhosale, *ACS omega*, 2021, **6**, 16704-16713.
38. S. N. Kodlady, B. Narayana, B. Sarojini, S. N. Karanth and B. Gauthama, *Supramolecular Chemistry*, 2020, **32**, 433-444.
39. A. Tigreros, J.-C. Castillo and J. Portilla, *Talanta*, 2020, **215**, 120905.
40. T. Sasikumar and M. Ilanchelian, *New Journal of Chemistry*, 2020, **44**, 4713-4718.
41. Q. Zou, F. Tao, H. Wu, W. Y. William, T. Li and Y. Cui, *Dyes and Pigments*, 2019, **164**, 165-173.
42. P. Q. Nhien, W.-L. Chou, T. T. K. Cuc, T. M. Khang, C.-H. Wu, N. Thirumalaivasan, B. T. B. Hue, J. I. Wu, S.-P. Wu and H.-C. Lin, *ACS applied materials & interfaces*, 2020, **12**, 10959-10972.
43. S. Cheng, X. Pan, M. Shi, T. Su, C. Zhang, W. Zhao and W. Dong, *Spectrochimica Acta Part A: Molecular and Biomolecular Spectroscopy*, 2020, **228**, 117710.
44. H. Singh, G. Singh, D. K. Mahajan, N. Kaur and N. Singh, *Sensors and Actuators B: Chemical*, 2020, **322**, 128622.
45. H. Zhang, D. Sun and T. Cao, *Int. J. Electrochem. Sci*, 2020, **15**, 3434-3444.
46. H. Yang, Y. Yang, S. Liu, X. Zhan, H. Zhou, X. Li and Z. Yuan, *Analytical and Bioanalytical Chemistry*, 2020, **412**, 5819-5826.
47. F. A. Al-Zahrani, R. M. El-Shishtawy, A. M. Asiri, A. M. Al-Solimy, K. A. Mellah, N. S. Ahmed and A. Jedidi, *BMC chemistry*, 2020, **14**, 1-11.
48. D. Aydin, *Microchemical Journal*, 2020, **159**, 105477.
49. J. H. Park, R. Manivannan, P. Jayasudha and Y.-A. Son, *Spectrochimica Acta Part A: Molecular and Biomolecular Spectroscopy*, 2020, **233**, 118190.
50. R. Nazarian, H. R. Darabi, K. Aghapoor, R. Firouzi and H. Sayahi, *Chemical Communications*, 2020, **56**, 8992-8995.
51. Y. Zhao, L. Feng, X. Meng and J. Guan, *Dyes and Pigments*, 2020, **183**, 108713.
52. J. Li, S. Yuan, J. S. Qin, J. Pang, P. Zhang, Y. Zhang, Y. Huang, H. F. Drake, W. R. Liu and H. C. Zhou, *Angewandte Chemie*, 2020, **132**, 9405-9409.
53. S. Erdemir and S. Malkondu, *Talanta*, 2020, **207**, 120278.
54. O. J. Achadu and T. Nyokong, *Dyes and Pigments*, 2019, **160**, 328-335.
55. G. Men, W. Han, C. Chen, C. Liang and S. Jiang, *Analyst*, 2019, **144**, 2226-2230.
56. N. Saini, C. Wannasiri, S. Chanmungkalakul, N. Prigyai, V. Ervithayasuporn and S. Kiatkamjornwong, *Journal of Photochemistry and Photobiology A: Chemistry*, 2019, **385**, 112038.
57. Z. Guo, Q. Niu, Q. Yang, T. Li and H. Chi, *Analytica Chimica Acta*, 2019, **1065**, 113-123.
58. L. Hou, F. Li, J. Guo, X. Zhang, X. Kong, X. T. Cui, C. Dong, Y. Wang and S. Shuang, *Journal of Materials Chemistry B*, 2019, **7**, 4620-4629.
59. Z. Guo, T. Hu, T. Sun, T. Li, H. Chi and Q. Niu, *Dyes and Pigments*, 2019, **163**, 667-674.
60. K. Deng, L. Wang, Q. Xia, R. Liu and J. Qu, *Sensors and Actuators B: Chemical*, 2019, **296**, 126645.
61. Z. Alinejad, M. Raeesi and A. R. Mahdavian, *Talanta*, 2019, **204**, 198-205.
62. Z. Li, Y. Song, Y. Dai, Y. Pei, Z. Lu and H. Guo, *Optical Materials*, 2019, **95**, 109235.
63. J. B. Arockiam and J. S. Park, *Spectrochimica Acta Part A: Molecular and Biomolecular Spectroscopy*, 2019, **207**, 112-117.
64. Y. Zhu, K. Wang, W. Song, B. Dong, S. Zhao, R. Guan, Z. Li, Y. Sun, D. Cao and W. Lin, *Sensors and Actuators B: Chemical*, 2019, **294**, 283-290.
65. P. G. Rao, B. Saritha and T. S. Rao, *Journal of Photochemistry and Photobiology A: Chemistry*, 2019, **372**, 177-185.
66. P. S. Kumar, P. R. Lakshmi and K. P. Elango, *New Journal of Chemistry*, 2019, **43**, 675-680.
67. R. Bhaskar and S. Sarveswari, *Inorganic Chemistry Communications*, 2019, **102**, 83-89.
68. Y. Sun, Y. Shan, N. Sun, Z. Li, X. Wu, R. Guan, D. Cao, S. Zhao and X. Zhao, *Spectrochimica Acta Part A: Molecular and Biomolecular Spectroscopy*, 2018, **205**, 514-519.



69. K. Wang, X. Yu, Y. Zhu, M. Xing, M. Liang, Y. Sun, D. Cao, R. Guan and Z. Liu, *Journal of Molecular Structure*, 2018, **1173**, 647-652.
70. M. Saraji and N. Bagheri, *Sensors and Actuators B: Chemical*, 2018, **270**, 28-34.
71. S. Momeni, R. Ahmadi, A. Safavi and I. Nabipour, *Talanta*, 2017, **175**, 514-521.
72. C. Chen, D. Zhao, T. Hu, J. Sun and X. Yang, *Sensors and Actuators B: Chemical*, 2017, **241**, 779-788.
73. M. Shamsipur, Z. Karimi and M. A. Tabrizi, *Microchemical Journal*, 2017, **133**, 485-489.
74. S. B. Roy, A. Maity and K. K. Rajak, *Inorganic Chemistry Communications*, 2017, **76**, 81-86.
75. J. Cang, C.-W. Wang, P.-C. Chen, Y.-J. Lin, Y.-C. Li and H.-T. Chang, *Analytical Methods*, 2017, **9**, 5254-5259.
76. R. Hallaj and N. Haghghi, *Microchimica Acta*, 2017, **184**, 3581-3590.
77. P. Wang, Y. Bai, C. Yao, X. Li, L. Zhou, W. Wang, A. M. El-Toni, J. Zi, D. Zhao and L. Shi, *Analytical chemistry*, 2017, **89**, 2583-2591.
78. L. Tian, Y. Li, T. Ren, Y. Tong, B. Yang and Y. Li, *Talanta*, 2017, **170**, 530-539.
79. Z.-Z. Dong, C. Yang, K. Vellaisamy, G. Li, C.-H. Leung and D.-L. Ma, *ACS sensors*, 2017, **2**, 1517-1522.
80. B. Barare, I. Babahan, Y. M. Hijji, E. Bonyi, S. Tadesse and K. Aslan, *Sensors*, 2016, **16**, 271.
81. Z. Shojaeifard, B. Hemmateenejad and M. Shamsipur, *ACS Applied Materials & Interfaces*, 2016, **8**, 15177-15186.
82. M. La, Y. Hao, Z. Wang, G.-C. Han and L. Qu, *Journal of Analytical Methods in Chemistry*, 2016, **2016**.
83. N. Vasimalai and M. T. Fernandez-Arguelles, *Nanotechnology*, 2016, **27**, 475505.
84. A. Surleva, M. Zaharia, O. Pintilie, I. Sandu, L. Tudorachi and R. V. Gradinaru, *Environmental Forensics*, 2016, **17**, 48-58.
85. S. Zhao, H. Liu, F. Wu and L. Zhu, *Chemistry Letters*, 2016, **45**, 570-572.
86. T. Alizadeh, R. E. Sabzi and H. Alizadeh, *Talanta*, 2016, **147**, 90-97.
87. N. Bagheri, N. Djafarzadeh and J. Hassanzadeh, *Analytical Sciences*, 2016, **32**, 317-322.
88. C. Cheng, H.-Y. Chen, C.-S. Wu, J. S. Meena, T. Simon and F.-H. Ko, *Sensors and Actuators B: Chemical*, 2016, **227**, 283-290.
89. T. B. Wei, G. T. Yan, H. Li, Y. R. Zhu, B. B. Shi, Q. Lin, H. Yao and Y. M. Zhang, *Supramolecular Chemistry*, 2016, **28**, 720-726.
90. Y. Byun, J. Park and J. Kim, *International Journal of Environmental Analytical Chemistry*, 2016, **96**, 845-861.
91. Q. Zhang, J. Zhang, H. Zuo, C. Wang and Y. Shen, *Tetrahedron*, 2016, **72**, 1244-1248.
92. Y. Li, Q. Wang, X. Zhou, C.-y. Wen, J. Yu, X. Han, X. Li, Z.-f. Yan and J. Zeng, *Sensors and Actuators B: Chemical*, 2016, **228**, 366-372.
93. P. Sharma, D. S. Rana, A. Umar, R. Kumar, M. S. Chauhan and S. Chauhan, *Talanta*, 2016, **153**, 57-65.
94. A. Attar, L. Cubillana-Aguilera, I. Naranjo-Rodriguez, J. L. H.-H. de Cisneros, J. M. Palacios-Santander and A. Amine, *Bioelectrochemistry*, 2015, **101**, 84-91.
95. A. Paul, M. Perween, S. Saha, D. N. Srivastava and A. Das, *Physical Chemistry Chemical Physics*, 2015, **17**, 26790-26796.
96. R. Moosavi, A. Afkhami and T. Madrakian, *RSC Advances*, 2015, **5**, 15886-15891.
